# Supplementary material for: The impact of gender equity in agriculture on nutritional status, diets, and household food security: a mixed-methods systematic review
Source: PubMed Central journal article supplement (PMC7170429; doi:10.1136/bmjgh-2019-002173), 2020-03-29
Supplement: bmjgh-2019-002173supp001.pdf [file bmjgh-2019-002173supp001.pdf]

Helen A Harris-Fry *et al.* | Online Supplementary Material

**Supplemental file: Effects of gender inequities in agriculture on food security, diets and nutritional status: a mixed-methods systematic review**

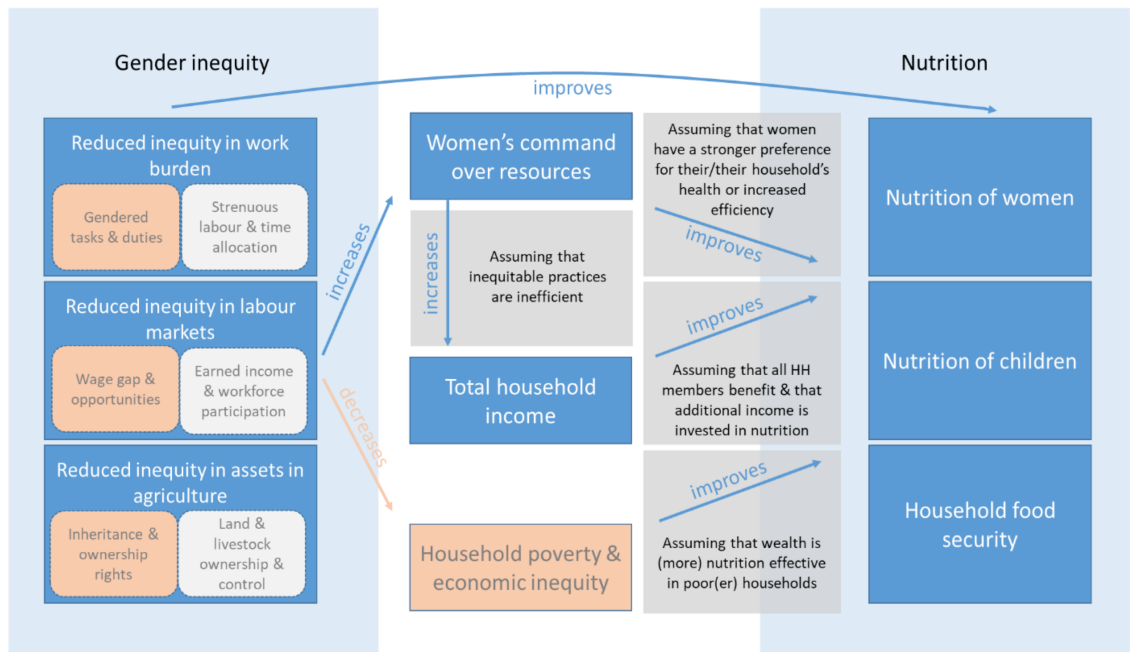

**Supplemental Figure 1: Hypothesised pathways from gender equity to improved nutrition outcomes**

Helen A Harris-Fry *et al.* | Online Supplementary Material**Supplemental Table 1: PRISMA checklist**

| Section/topic                      | #  | Checklist item                                                                                                                                                                                                                                                                                              | Reported on page #        |
|------------------------------------|----|-------------------------------------------------------------------------------------------------------------------------------------------------------------------------------------------------------------------------------------------------------------------------------------------------------------|---------------------------|
| <b>Title</b>                       |    |                                                                                                                                                                                                                                                                                                             |                           |
| Title                              | 1  | Identify the report as a systematic review, meta-analysis, or both.                                                                                                                                                                                                                                         | 1                         |
| <b>Abstract</b>                    |    |                                                                                                                                                                                                                                                                                                             |                           |
| Structured summary                 | 2  | Provide a structured summary including, as applicable: background; objectives; data sources; study eligibility criteria, participants, and interventions; study appraisal and synthesis methods; results; limitations; conclusions and implications of key findings; systematic review registration number. | 3                         |
| <b>Introduction</b>                |    |                                                                                                                                                                                                                                                                                                             |                           |
| Rationale                          | 3  | Describe the rationale for the review in the context of what is already known.                                                                                                                                                                                                                              | 5                         |
| Objectives                         | 4  | Provide an explicit statement of questions being addressed with reference to participants, interventions, comparisons, outcomes, and study design (PICOS).                                                                                                                                                  | 6                         |
| <b>Methods</b>                     |    |                                                                                                                                                                                                                                                                                                             |                           |
| Protocol and registration          | 5  | Indicate if a review protocol exists, if and where it can be accessed (e.g., Web address), and, if available, provide registration information including registration number.                                                                                                                               | 6                         |
| Eligibility criteria               | 6  | Specify study characteristics (e.g., PICOS, length of follow-up) and report characteristics (e.g., years considered, language, publication status) used as criteria for eligibility, giving rationale.                                                                                                      | 6-8                       |
| Information sources                | 7  | Describe all information sources (e.g., databases with dates of coverage, contact with study authors to identify additional studies) in the search and date last searched.                                                                                                                                  | 8<br>Supplemental Table 3 |
| Search                             | 8  | Present full electronic search strategy for at least one database, including any limits used, such that it could be repeated.                                                                                                                                                                               | Supplemental Table 2      |
| Study selection                    | 9  | State the process for selecting studies (i.e., screening, eligibility, included in systematic review, and, if applicable, included in the meta-analysis).                                                                                                                                                   | 8                         |
| Data collection process            | 10 | Describe method of data extraction from reports (e.g., piloted forms, independently, in duplicate) and any processes for obtaining and confirming data from investigators.                                                                                                                                  | 8                         |
| Data items                         | 11 | List and define all variables for which data were sought (e.g., PICOS, funding sources) and any assumptions and simplifications made.                                                                                                                                                                       | 8                         |
| Risk of bias in individual studies | 12 | Describe methods used for assessing risk of bias of individual studies (including specification of whether this was done at the study or outcome level), and how this information is to be used in any data synthesis.                                                                                      | 9                         |
| Summary measures                   | 13 | State the principal summary measures (e.g., risk ratio, difference in means).                                                                                                                                                                                                                               | 10                        |
| Synthesis of results               | 14 | Describe the methods of handling data and combining results of studies, if done, including measures of consistency (e.g., $I^2$ ) for each meta-analysis.                                                                                                                                                   | 11                        |

Helen A Harris-Fry *et al.* | Online Supplementary Material

|                               |    |                                                                                                                                                                                                          |                           |
|-------------------------------|----|----------------------------------------------------------------------------------------------------------------------------------------------------------------------------------------------------------|---------------------------|
| Risk of bias across studies   | 15 | Specify any assessment of risk of bias that may affect the cumulative evidence (e.g., publication bias, selective reporting within studies).                                                             | 11                        |
| Additional analyses           | 16 | Describe methods of additional analyses (e.g., sensitivity or subgroup analyses, meta-regression), if done, indicating which were pre-specified.                                                         | 11                        |
| <b>Results</b>                |    |                                                                                                                                                                                                          |                           |
| Study selection               | 17 | Give numbers of studies screened, assessed for eligibility, and included in the review, with reasons for exclusions at each stage, ideally with a flow diagram.                                          | Fig 1                     |
| Study characteristics         | 18 | For each study, present characteristics for which data were extracted (e.g., study size, PICOS, follow-up period) and provide the citations.                                                             | Supplemental Table 4      |
| Risk of bias within studies   | 19 | Present data on risk of bias of each study and, if available, any outcome level assessment (see item 12).                                                                                                | Supplemental Tables 5 & 6 |
| Results of individual studies | 20 | For all outcomes considered (benefits or harms), present, for each study: (a) simple summary data for each intervention group (b) effect estimates and confidence intervals, ideally with a forest plot. | Tables 1-3 & Fig 2        |
| Synthesis of results          | 21 | Present results of each meta-analysis done, including confidence intervals and measures of consistency.                                                                                                  | Fig 2                     |
| Risk of bias across studies   | 22 | Present results of any assessment of risk of bias across studies (see Item 15).                                                                                                                          | Supplemental Tables 5 & 6 |
| Additional analysis           | 23 | Give results of additional analyses, if done (e.g., sensitivity or subgroup analyses, meta-regression [see Item 16]).                                                                                    | 15, 21 & Table 3          |
| <b>Discussion</b>             |    |                                                                                                                                                                                                          |                           |
| Summary of evidence           | 24 | Summarize the main findings including the strength of evidence for each main outcome; consider their relevance to key groups (e.g., healthcare providers, users, and policy makers).                     | 24                        |
| Limitations                   | 25 | Discuss limitations at study and outcome level (e.g., risk of bias), and at review-level (e.g., incomplete retrieval of identified research, reporting bias).                                            | 25                        |
| Conclusions                   | 26 | Provide a general interpretation of the results in the context of other evidence, and implications for future research.                                                                                  | 26                        |
| <b>Funding</b>                |    |                                                                                                                                                                                                          |                           |
| Funding                       | 27 | Describe sources of funding for the systematic review and other support (e.g., supply of data); role of funders for the systematic review.                                                               | 27                        |

Helen A Harris-Fry *et al.* | Online Supplementary Material**Supplemental Table 2: Sample search string**

Formatted for MEDLINE (Ovid)

|   |                                                                                                                                                                                                                                                                                                                                                                                                                                                                                                                                                                                                                                                                                                                                                                                                                            |
|---|----------------------------------------------------------------------------------------------------------------------------------------------------------------------------------------------------------------------------------------------------------------------------------------------------------------------------------------------------------------------------------------------------------------------------------------------------------------------------------------------------------------------------------------------------------------------------------------------------------------------------------------------------------------------------------------------------------------------------------------------------------------------------------------------------------------------------|
| 1 | (( land adj5 right* ) OR landownership OR ( land adj5 own* ) OR ( land adj5 tenure ) OR ( property adj5 right* ) OR ( land adj5 tit* ) OR (land adj3 use*) OR ( asset* adj5 own* ) OR ( asset* adj5 right* ) OR ( livestock adj5 own* ) OR ( livestock adj5 right* ) OR ( land adj5 access ) OR ( property adj5 access ) OR ( poultry adj5 own* ) OR ( control* adj5 land ) OR ( control* adj5 asset* ) OR ( control* adj5 livestock ) OR ( inherit* adj5 right* ) OR ( inherit* adj5 practic* ) OR ( farmland adj5 right* ) OR ( farmland adj5 own* ) OR ( farmland adj5 tenure ) OR ( farmland adj5 tit* ) OR ( farmland adj5 access ) OR ( farmland adj5 control ) OR (inherit* adj3 (asset* OR land OR farmland)) OR ((decision* OR power) adj3 ( land OR livestock OR farmland OR asset* OR poultry ))) .ti,ab,kw,sh. |
| 2 | ( wage* OR remunerat* OR pay* OR paid OR salar* OR income* OR labor* OR labour* OR employ* OR workforce OR ( ( vocation* OR job* OR occupation* OR profession* ) adj3 ( opportunit* OR participa* ) ) OR (livelihood* adj3 opportunit*) OR ( ( intrahousehold OR "intra household" ) adj5 bargain* ) OR ( ( intrahousehold OR "intra household" ) adj5 allocat* ) OR ( ( intrahousehold OR "intra household" ) adj5 ( decision* adj3 ( make* OR making OR made ) ) ) OR ( within adj3 ( household adj5 ( allocation OR bargain* ) ) ) ) .ti,ab,kw,sh.                                                                                                                                                                                                                                                                      |
| 3 | ( task* OR ( time adj3 use* ) OR activit* OR ( time adj3 allocat* ) OR workload* OR ( energ* adj3 expend* ) ) .ti,ab,kw,sh.                                                                                                                                                                                                                                                                                                                                                                                                                                                                                                                                                                                                                                                                                                |
| 4 | (nutr* OR nourish* OR undernutrition OR undernourish* OR underweight OR bmi OR body mass index OR anthropom* OR stunt* OR haz OR height-for-age OR length-for-age OR wasting OR wasted OR WHZ OR WLZ OR WAZ diet* OR mdds OR mdd-w OR mddw OR dds OR diversity score OR malnutrition OR caloric deficienc* OR malnourish* OR food security OR food insecurity OR ( food adj5 expenditure* ) OR ( food adj5 consumption ) OR ( food adj3 share* ) OR ( staple* adj5 share) OR hfias OR ( ( food OR calorie ) adj3 intake ) OR ( ( intrahousehold OR intra household ) adj3 welfare ) ) .ti,ab,kw,sh.                                                                                                                                                                                                                        |
| 5 | (( ( sex OR gender* OR female* OR woman OR women ) AND ( equit* OR equalit* OR inequit* OR unequal* OR unequal* OR discriminat* OR power OR bargain* OR empower* OR disempower* ) ) OR (( sex OR gender* OR female* OR woman OR women ) adj5 power)) .ti,ab,kw,sh.                                                                                                                                                                                                                                                                                                                                                                                                                                                                                                                                                         |
| 6 | (( ( sex OR gender* OR female* OR woman OR women ) adj3 (bias* OR parity) ) OR (effects adj3 gender)) .ti,ab,kw,sh.                                                                                                                                                                                                                                                                                                                                                                                                                                                                                                                                                                                                                                                                                                        |
| 7 | (( ( sex OR gender* OR female* OR woman OR women ) AND ( ( share OR gap OR distrib* ) adj3 ( land OR landownership OR property OR asset* OR livestock OR poultry OR inherit* OR farmland OR wage* OR remunerat* OR pay* OR paid OR salar* OR income* OR labor* OR labour* OR employ* OR workforce OR ( ( vocation* OR job* OR occupation* OR profession* ) adj3 ( opportunit* OR participa* ) ) OR task* OR activit* OR workload* ) ) ) .ti,ab,kw,sh.                                                                                                                                                                                                                                                                                                                                                                      |

Helen A Harris-Fry *et al.* | Online Supplementary Material

|    |                                                                                                                                                                                                                                                                                                                                                                                                                                                                                                                                                                                                                                                                                                                                                                                                                                                                                                                                                                                                                                                                                                                                                                                                                                                                                                                                                                                                                                                                                                                                                                                                                                                                                                                                                                                                                                                                                                                                                                                                                                                                                                                                                                                                                                                                                                                                                                                                                                                                                                                                                                                                                                                                                            |
|----|--------------------------------------------------------------------------------------------------------------------------------------------------------------------------------------------------------------------------------------------------------------------------------------------------------------------------------------------------------------------------------------------------------------------------------------------------------------------------------------------------------------------------------------------------------------------------------------------------------------------------------------------------------------------------------------------------------------------------------------------------------------------------------------------------------------------------------------------------------------------------------------------------------------------------------------------------------------------------------------------------------------------------------------------------------------------------------------------------------------------------------------------------------------------------------------------------------------------------------------------------------------------------------------------------------------------------------------------------------------------------------------------------------------------------------------------------------------------------------------------------------------------------------------------------------------------------------------------------------------------------------------------------------------------------------------------------------------------------------------------------------------------------------------------------------------------------------------------------------------------------------------------------------------------------------------------------------------------------------------------------------------------------------------------------------------------------------------------------------------------------------------------------------------------------------------------------------------------------------------------------------------------------------------------------------------------------------------------------------------------------------------------------------------------------------------------------------------------------------------------------------------------------------------------------------------------------------------------------------------------------------------------------------------------------------------------|
| 8  | (( ( intrahousehold OR intra household ) adj5 bargain* ) OR ( ( intrahousehold OR intra household ) adj5 allocat* ) OR ( ( intrahousehold OR intra household ) adj5 ( decision* adj3 ( make* OR making OR made ) ) ) OR ( within adj3 ( household adj5 ( allocation OR bargain* ) ) ) AND ( sex OR gender* OR female* OR woman OR women ) ).ti,ab,kw,sh.                                                                                                                                                                                                                                                                                                                                                                                                                                                                                                                                                                                                                                                                                                                                                                                                                                                                                                                                                                                                                                                                                                                                                                                                                                                                                                                                                                                                                                                                                                                                                                                                                                                                                                                                                                                                                                                                                                                                                                                                                                                                                                                                                                                                                                                                                                                                   |
| 9  | (1 or 2 or 3) and 4 and (5 or 6 or 7 or 8)                                                                                                                                                                                                                                                                                                                                                                                                                                                                                                                                                                                                                                                                                                                                                                                                                                                                                                                                                                                                                                                                                                                                                                                                                                                                                                                                                                                                                                                                                                                                                                                                                                                                                                                                                                                                                                                                                                                                                                                                                                                                                                                                                                                                                                                                                                                                                                                                                                                                                                                                                                                                                                                 |
| 10 | ( afghanistan OR albania OR algeria OR angola OR argentina OR armenia OR armenian OR azerbaijan OR bangladesh OR benin OR byelarus OR byelorussian OR belarus OR belorussian OR belorussia OR belize OR bhutan OR bolivia OR bosnia OR herzegovina OR hercegovina OR botswana OR brazil OR bulgaria OR Burkina Faso OR Burkina Fasso OR Upper Volta OR burundi OR urundi OR cambodia OR Khmer Republic OR kampuchea OR cameroon OR cameroons OR cameron OR camerons OR Cape Verde OR Central African Republic OR chad OR china OR colombia OR comoros OR comoro islands OR comores OR mayotte OR congo OR zaire OR Costa Rica OR Cote d'Ivoire OR Ivory Coast OR cuba OR djibouti OR somaliland OR dominica OR Dominican Republic OR East Timor OR East Timur OR Timor Leste OR ecuador OR egypt OR United Arab Republic OR El Salvador OR eritrea OR ethiopia OR fiji OR gabon OR Gabonese Republic OR gambia OR gaza OR Georgia Republic OR Georgian Republic OR ghana OR grenada OR guatemala OR guinea OR guiana OR guyana OR haiti OR honduras OR india OR maldives OR indonesia OR iran OR iraq OR jamaica OR jordan OR kazakhstan OR kazakh OR kenya OR kiribati OR korea OR kosovo OR kyrgyzstan OR kirghizia OR Kyrgyz Republic OR kirghiz OR kirgizstan OR Lao PDR OR laos OR lebanon OR lesotho OR basutoland OR liberia OR libya OR macedonia OR madagascar OR Malagasy Republic OR malaysia OR malaya OR malay OR sabah OR sarawak OR malawi OR mali OR Marshall Islands OR mauritania OR mauritius OR Agalega Islands OR mexico OR micronesia OR Middle East OR moldova OR moldovia OR moldovian OR mongolia OR montenegro OR morocco OR ifni OR mozambique OR myanmar OR myanma OR burma OR namibia OR nepal OR Netherlands Antilles OR nicaragua OR niger OR nigeria OR muscat OR pakistan OR palau OR palestine OR panama OR paraguay OR peru OR philippines OR philipines OR phillipines OR phillippines OR Papua New Guinea OR romania OR rumania OR roumania OR rwanada OR ruanda OR Saint Lucia OR St Lucia OR Saint Vincent OR St Vincent OR grenadines OR samoa OR Samoan Islands OR Navigator Island OR Navigator Islands OR Sao Tome OR senegal OR serbia OR montenegro OR seychelles OR Sierra Leone OR Sri Lanka OR Solomon Islands OR somalia OR sudan OR suriname OR surinam OR swaziland OR South Africa OR syria OR tajikistan OR tadjhikistan OR tadjikistan OR tadhik OR tanzania OR thailand OR togo OR Togolese Republic OR tonga OR tunisia OR turkey OR turkmenistan OR turkmen OR uganda OR ukraine OR uzbekistan OR uzbek OR vanuatu OR New Hebrides OR venezuela OR vietnam OR Viet Nam OR West Bank OR yemen OR zambia OR zimbabwe ).ti,ab,kw,sh. |
| 11 | (( ( developing OR less* developed OR under developed OR underdeveloped OR middle income OR low* income OR underserved OR under served OR deprived OR poor* ) adj2 ( countr* OR nation* OR population* OR world OR state* ) ) OR ( ( developing OR less* developed OR under developed OR underdeveloped OR middle income OR low* income ) adj2 ( economy OR economies ) ) OR ( low* adj2 ( gdp OR                                                                                                                                                                                                                                                                                                                                                                                                                                                                                                                                                                                                                                                                                                                                                                                                                                                                                                                                                                                                                                                                                                                                                                                                                                                                                                                                                                                                                                                                                                                                                                                                                                                                                                                                                                                                                                                                                                                                                                                                                                                                                                                                                                                                                                                                                          |

Helen A Harris-Fry *et al.* | Online Supplementary Material

|                                                                                                                                                                                                                                                                                                                                                  |
|--------------------------------------------------------------------------------------------------------------------------------------------------------------------------------------------------------------------------------------------------------------------------------------------------------------------------------------------------|
| gnp OR gross domestic OR gross national ) ) OR ( low adj3 middle adj3 countr* ) OR ( lmic OR lmic OR ( third adj2 world ) OR lami countr* OR transitional countr* ) OR Africa OR (Africa* NOT African American) OR asia* OR Latin America* OR South America* OR Central America* OR caribbean OR oceania* OR Middle East* OR mena ).ti,ab,kw,sh. |
| 12<br>14 10 OR 11                                                                                                                                                                                                                                                                                                                                |
| 13<br>9 AND 12                                                                                                                                                                                                                                                                                                                                   |

Helen A Harris-Fry *et al.* | Online Supplementary Material**Supplemental Table 3: Databases, repositories and journals**

|                                   |                                                                                                                                                                                                                                                                                                                                                                                                                                                                                                                                                                                                                                                                  |
|-----------------------------------|------------------------------------------------------------------------------------------------------------------------------------------------------------------------------------------------------------------------------------------------------------------------------------------------------------------------------------------------------------------------------------------------------------------------------------------------------------------------------------------------------------------------------------------------------------------------------------------------------------------------------------------------------------------|
| <b>Databases</b>                  | <ul style="list-style-type: none"> <li>• EBSCO</li> <li>• Medline</li> <li>• Scopus</li> <li>• Web of Science</li> <li>• Popline</li> <li>• CAB</li> <li>• Eldis</li> <li>• OpenTrial</li> <li>• Bridge Data</li> <li>• AGRIS (including FAO and IFPRI libraries, listed separately in the protocol)</li> </ul>                                                                                                                                                                                                                                                                                                                                                  |
| <b>Hand-searched repositories</b> | <ul style="list-style-type: none"> <li>• Bill and Melinda Gates Foundation Grants Database</li> <li>• DfID Research for Development Outputs</li> <li>• 3ie Impact Evaluation Repository</li> <li>• The World Bank IEG evaluations</li> <li>• UNICEF Evaluation Database</li> <li>• USAID DEC</li> <li>• AEA RCT Registry</li> <li>• Cochrane Library</li> </ul>                                                                                                                                                                                                                                                                                                  |
| <b>Journals</b>                   | <ul style="list-style-type: none"> <li>• American Journal of Agricultural Economics</li> <li>• Food Policy</li> <li>• Journal of Development Economics</li> <li>• Maternal and Child Health Journal</li> <li>• Public Health Nutrition</li> <li>• The Journal of Development Studies</li> <li>• The Journal of Nutrition</li> <li>• The Lancet</li> <li>• The Lancet Global Health</li> <li>• The proceedings of the Argiculture, Nutrition and Health Academy conference</li> <li>• The proceedings of the CSAE Conference</li> <li>• The proceedings of the NEUDC Conference</li> <li>• The World Bank Economic Review</li> <li>• World Development</li> </ul> |

Helen A Harris-Fry *et al.* | Online Supplementary Material**Supplemental Table 4: Characteristics of included studies**

|                                                      | Country                                                                  | Sample included in analysis                                                 | Data type                                                        | Exposure(s)                                                | Outcome(s)                                                                               |
|------------------------------------------------------|--------------------------------------------------------------------------|-----------------------------------------------------------------------------|------------------------------------------------------------------|------------------------------------------------------------|------------------------------------------------------------------------------------------|
| <b>QUANTITATIVE STUDIES</b>                          |                                                                          |                                                                             |                                                                  |                                                            |                                                                                          |
| <b>Gender inequity in income (n=15)</b>              |                                                                          |                                                                             |                                                                  |                                                            |                                                                                          |
| Razzaque & Toufique (2007) (24)                      | Bangladesh                                                               | 1038 households                                                             | Cross-sectional survey                                           | Women's share of household income                          | Food share                                                                               |
| Gaiha & Kulkarni (2005) (25)                         | India                                                                    | 26 854 households                                                           | Cross-sectional survey                                           | Male-female wage difference                                | Severe stunting (height-for-age < -3 SD)                                                 |
| Lancaster, Maitra & Ray (2006) (26)                  | India (rural Kerala)<br>India (rural Bihar)<br>India (rural Maharashtra) | 1321 households<br>2824 households<br>2131 households                       | Cross-sectional survey                                           | Women's share of household wage income                     | Food share                                                                               |
| Senauer & Garcia (1988) (27)                         | Philippines                                                              | 140 households;<br>476 individuals<br>~800 households;<br>2320 observations | Longitudinal survey; 4 waves                                     | Mother's wage vs. father's                                 | Child's energy adequacy ratio<br><br>Height-for-age z-score<br>Weight-for-height z-score |
| Hopkins, Levin & Haddad (1994) (23)                  | Niger                                                                    | 452 observations;<br>135 households                                         | Longitudinal survey                                              | Women's income vs. men's                                   | Ln food expenditure                                                                      |
| Aromolaran (2004) (28)                               | Nigeria                                                                  | 2573 individuals; 472 households                                            | Fortnightly measurements, treated as a cross-section in analysis | Women's share of household income                          | Ln food expenditure                                                                      |
| Hoddinott & Haddad (1994) (10)                       | Côte d'Ivoire                                                            | 1503 households                                                             | Cross-sectional survey                                           | Wives' share of household cash income                      | Ln food expenditure                                                                      |
| Duflo & Udry (2004) (29)                             | Côte d'Ivoire                                                            | 973 observations; > 800 households                                          | Longitudinal survey; 3 waves                                     | Change in women's income vs. change in men's               | Ln food expenditure                                                                      |
| Van den Broeck, Van Hoyweghen, & Maertens (2018)(30) | Senegal                                                                  | 461 households                                                              | Longitudinal survey; 2 waves                                     | Women's employment in agricultural export sector vs. men's | Household Food Insecurity Assess Scale                                                   |
| Lachaud (1998)(31)                                   | Burkina Faso                                                             | 1352 households                                                             | Cross-sectional survey                                           | Women's share of household income                          | Underweight (WAZ < -2 SD)<br>Stunting (HAZ < -2 SD)<br>Wasting (WHZ < -2 SD)             |
|                                                      |                                                                          | 4744 households                                                             | Cross-sectional survey                                           | Women's share of household income                          | Food share                                                                               |



Helen A Harris-Fry *et al.* | Online Supplementary Material

|                                                     | Country   | Sample included in analysis                                            | Data type                       | Exposure(s)                                                                        | Outcome(s)                           |
|-----------------------------------------------------|-----------|------------------------------------------------------------------------|---------------------------------|------------------------------------------------------------------------------------|--------------------------------------|
| Marinda (2006)(32)                                  | Kenya     | 129 households                                                         | Cross-sectional survey          | Mothers' income minus men's                                                        | Height-for-age z-score               |
| Shoo (2011)(33)                                     | Tanzania  | 152 households                                                         | Cross-sectional survey          | Mother has a non-farming source of income vs. father                               | Weight-for-age z-score               |
| Josephson (2018) (34)                               | Malawi    | 693 households                                                         | Longitudinal survey; 2 waves    | Change in women's Ln agricultural income vs. men's                                 | Ln food expenditure                  |
| McCarthy & Kilic (2017) (35)                        | Malawi    | 1929 households; 3858 observations                                     | Longitudinal survey; 2 waves    | Women earn all unpooled income vs. men earn all                                    | Food expenditure<br>Food share       |
| Attanasio & Lechene (2002) (45)                     | Mexico    | 7742 households                                                        | Longitudinal survey; 5 waves    | Women's share of household income                                                  | Food share                           |
| <b>Gender inequity in land and livestock (n=10)</b> |           |                                                                        |                                 |                                                                                    |                                      |
| Santos <i>et al.</i> (2014) (36)                    | India     | 1035 households                                                        | Longitudinal survey; 2 waves    | Women's name on land title vs. men's                                               | Household Dietary Diversity Score    |
| Menon, Van der Meulen Rodgers & Nguyen (2014) (37)  | Vietnam   | 7623 individuals in 2004 and 7203 individuals in 2008; 1728 households | Longitudinal survey; 2 waves    | Women have land use certificate vs. men                                            | Food share                           |
| Quisumbing & Maluccio (2003) (38)                   | Indonesia | 114 households                                                         | Cross-sectional survey          | Ln wife's land size at marriage vs. husband's, in hectares                         | Food share                           |
| Pangaribowo (2013) (39)                             | Indonesia | Not reported                                                           | Longitudinal survey             | Women's share of household livestock assets                                        | Food share                           |
| Kusago & Barham (2001)(50)                          | Malaysia  | 120 households                                                         | Cross-sectional survey          | Women's share of household assets (predominantly land)                             | Food share                           |
| Muchomba (2017) (41)                                | Ethiopia  | 1061 households                                                        | Longitudinal survey; 7 waves    | Joint land titling vs. men only                                                    | Food share<br>Ln food expenditure    |
| Kumar (1994) (42)                                   | Zambia    | 213 households                                                         | Longitudinal survey             | Share of household land size farmed by women (jointly or individually)             | Ln household dietary diversity score |
| Doss (2006) (43)                                    | Ghana     | Not reported                                                           | Repeated cross-sectional survey | Women's share of household agricultural land                                       | Food share                           |
| Quisumbing & Maluccio (2003) (38)                   | Ethiopia  | 1347 households                                                        | Cross-sectional survey          | Ln value of wife's land and livestock at marriage vs. husband's, in Ethiopian Birr | Food share                           |
| Jin & Iannotti (2014) (44)                          | Kenya     | 183 individuals                                                        | Cross-sectional                 | Women's livestock value                                                            | Height-for-age z-score               |

Helen A Harris-Fry *et al.* | Online Supplementary Material

| Country                                      | Sample included in analysis                                                       | Data type                                                    | Exposure(s)                                                                   | Outcome(s)                                          |
|----------------------------------------------|-----------------------------------------------------------------------------------|--------------------------------------------------------------|-------------------------------------------------------------------------------|-----------------------------------------------------|
|                                              |                                                                                   | survey                                                       | (solely or jointly owned) minus men's (solely owned), in Kenyan Shillings     | Weight-for-age z-score<br>Weight-for-height z-score |
| <b>Gender inequity in work burdens (n=1)</b> |                                                                                   |                                                              |                                                                               |                                                     |
| Kumar (1994) (42)                            | Zambia<br>213 households                                                          | Longitudinal survey                                          | Male-female difference in predicted annual household maintenance labour hours | Ln household dietary diversity score                |
| <b>QUALITATIVE STUDIES</b>                   |                                                                                   |                                                              |                                                                               |                                                     |
| Chaturvedi, et al. (2016) (46)               | India<br>647 (509 individual interviews + 66 groups + 72 non-formal interactions) | Interviews, focus group discussions, non-formal interactions | Inequity in time burden                                                       | Child dietary quality and undernutrition            |
| Nichols (2016) (47)                          | India<br>81 individuals                                                           | Interviews supported by participant observation              | Inequity in workload                                                          | Women's dietary quality                             |
| Morrison et al. (2017) (48)                  | Nepal<br>25 interviews + 2 groups                                                 | Interviews and focus group discussions                       | Inequity in earned income<br>Inequity in workload                             | Women's dietary quality                             |
| Mwangome et al. (2010) (49)                  | Gambia<br>63 individuals (8 groups)                                               | Focus group discussions                                      | Inequity in workload                                                          | Child dietary quality                               |
| Me-Nsope, et al. (2016) (50)                 | Malawi<br>329 individuals (39 key informants and 24 groups)                       | Key informant and group interviews                           | Inequity in land inheritance<br>Inequity in income                            | Household food security                             |
| Geheb et al. (2008) (51)                     | Kenya, Uganda, Tanzania<br>254 individuals                                        | Focus group discussions, informal interviews, observations   | Inequity in workforce participation                                           | Household food expenditures                         |
| Galiè et al. (2015) (52)                     | Tanzania<br>105 individuals                                                       | Participatory interviews                                     | Inequity in income<br>Inequity in livestock                                   | Household food security                             |
|                                              | Ethiopia<br>18 individuals                                                        | Participatory interviews                                     | Inequity in livestock<br>Inequity in labour norms                             | Household food security                             |
|                                              | Nicaragua<br>12 individuals                                                       | Participatory interviews                                     | Inequity in income                                                            | Household food security                             |

Helen A Harris-Fry *et al.* | Online Supplementary Material**Supplemental Table 5: Risk of bias assessment for quantitative studies, using an adapted version of the ROBINS-I tool**

|                                              | Confounding | Selection | Exposure classification | Missing data | Outcome measurement | Reporting | Instrumentation | Overall |
|----------------------------------------------|-------------|-----------|-------------------------|--------------|---------------------|-----------|-----------------|---------|
| <b>Gender inequity in income</b>             |             |           |                         |              |                     |           |                 |         |
| Razzaque & Toufique                          | ○           | ◇         | ○                       | ◇            | ○                   | ○         | ○               | ○       |
| Gaiha & Kulkarni                             | ○           | ○         | ○                       | ○            | ○                   | ○         | ○               | ○       |
| Lancaster, Maitra & Ray                      | ○           | ○         | ○                       | ○            | ○                   | ○         | ○               | ○       |
| Senauer & Garcia (energy adequacy ratio)     | ○           | ○         | ○                       | ◇            | ○                   | ○         | ○               | ○       |
| Senauer & Garcia (height-for-age)            | ○           | ○         | ○                       | ◇            | ○                   | ○         | ○               | ○       |
| Senauer & Garcia (weight-for-height)         | ○           | ○         | ○                       | ◇            | ○                   | ○         | ○               | ○       |
| Hopkins, Levin & Haddad                      | ○           | ○         | ○                       | ◇            | ○                   | ○         | ○               | ○       |
| Aromolaran                                   | ○           | ○         | ○                       | ○            | ○                   | ○         | ○               | ○       |
| Hoddinott & Haddad                           | ○           | ○         | ○                       | ○            | ○                   | ○         | ○               | ○       |
| Duflo & Udry                                 | ○           | ○         | ○                       | ○            | ○                   | ○         | ○               | ○       |
| Van den Broeck, Van Hoyweghen, & Maertens    | ○           | ○         | ○                       | ○            | ○                   | ○         | ●               | ○       |
| Lachaud (food share)                         | ○           | ○         | ○                       | ○            | ○                   | ○         | ○               | ○       |
| Lachaud (low height-for-age)                 | ○           | ○         | ○                       | ○            | ○                   | ○         | ○               | ○       |
| Lachaud (low weight-for-height)              | ○           | ○         | ○                       | ○            | ○                   | ○         | ○               | ○       |
| Lachaud (low weight-for-age)                 | ○           | ○         | ○                       | ○            | ○                   | ○         | ○               | ○       |
| Marinda                                      | ○           | ○         | ◇                       | ○            | ○                   | ○         | ◇               | ○       |
| Shoo                                         | ○           | ○         | ○                       | ○            | ○                   | ○         | ●               | ○       |
| Josephson                                    | ○           | ○         | ○                       | ○            | ○                   | ○         | ○               | ○       |
| McCarthy & Kilic                             | ○           | ○         | ○                       | ○            | ○                   | ○         | ●               | ○       |
| Attanasio & Lechene                          | ○           | ○         | ○                       | ○            | ○                   | ○         | ○               | ○       |
| <b>Gender inequity in land and livestock</b> |             |           |                         |              |                     |           |                 |         |
| Santos <i>et al.</i>                         | ○           | ○         | ○                       | ○            | ○                   | ○         | ●               | ○       |
| Menon, Van der Meulen Rodgers & Nguyen       | ○           | ○         | ○                       | ○            | ○                   | ○         | ●               | ○       |
| Quisumbing & Maluccio                        | ○           | ○         | ○                       | ○            | ○                   | ○         | ○               | ○       |
| Pangaribowo                                  | ○           | ○         | ○                       | ◇            | ○                   | ○         | ●               | ○       |
| Kusago & Barham                              | ○           | ○         | ◇                       | ◇            | ○                   | ○         | ●               | ○       |
| Muchomba (food share)                        | ○           | ○         | ○                       | ○            | ○                   | ○         | ●               | ○       |
| Muchomba (food expenditure)                  | ○           | ○         | ○                       | ○            | ○                   | ○         | ●               | ○       |
| Kumar                                        | ○           | ○         | ○                       | ○            | ○                   | ○         | ●               | ○       |
| Doss (1992)                                  | ○           | ○         | ○                       | ◇            | ○                   | ○         | ●               | ○       |
| Doss (1999)                                  | ○           | ○         | ○                       | ◇            | ○                   | ○         | ●               | ○       |
| Quisumbing & Maluccio                        | ○           | ○         | ○                       | ○            | ○                   | ○         | ○               | ○       |
| Jin & Iannotti (height-for-age z-score)      | ○           | ◇         | ○                       | ◇            | ○                   | ○         | ●               | ○       |
| Jin & Iannotti (weight-for-height z-score)   | ○           | ◇         | ○                       | ◇            | ○                   | ○         | ●               | ○       |
| Jin & Iannotti (weight-for-age z-score)      | ○           | ◇         | ○                       | ◇            | ○                   | ○         | ●               | ○       |
| <b>Gender inequity in workloads</b>          |             |           |                         |              |                     |           |                 |         |
| Kumar                                        | ○           | ○         | ◇                       | ○            | ○                   | ○         | ◇               | ○       |

○ critical; ○ serious; ○ moderate; ○ low; ◇ no information; ● not applicable

Helen A Harris-Fry *et al.* | Online Supplementary Material**Supplemental Table 6: Quality assessment of qualitative studies, using Lockwood, Munn and Porritt tool**

|                                                                                                                             | South Asia               |         |                        | Sub-Saharan Africa  |                        |                        | Multiple regions*   |
|-----------------------------------------------------------------------------------------------------------------------------|--------------------------|---------|------------------------|---------------------|------------------------|------------------------|---------------------|
| Quality domain from Lockwood, Munn & Porritt                                                                                | Chaturvedi <i>et al.</i> | Nichols | Morrison <i>et al.</i> | Geheb <i>et al.</i> | Mwangome <i>et al.</i> | Me-Nsope <i>et al.</i> | Galiè <i>et al.</i> |
| 1. Is there congruity between philosophical perspective and methodology?                                                    | Y                        | PY      | PY                     | N                   | Y                      | PY                     | Y                   |
| 2. Is there congruity between research question and methodology?                                                            | Y                        | PY      | Y                      | PY                  | PY                     | PY                     | Y                   |
| 3. Is there congruity between methodology and sampling methods?                                                             | PY                       | PY      | Y                      | PY                  | N                      | NI                     | PN                  |
| 4. Is there congruity between methodology and methods used to collect data?                                                 | Y                        | NI      | Y                      | NI                  | PY                     | PY                     | PY                  |
| 5. Is there congruity between methodology and representation and analysis of data?                                          | PY                       | NI      | Y                      | NI                  | PN                     | N                      | PN                  |
| 6. Is there congruity between methodology and interpretation of results?                                                    | PY                       | N       | PY                     | PN                  | PN                     | N                      | Y                   |
| 7. Is there a statement locating researcher culturally or theoretically?                                                    | N                        | PN      | N                      | N                   | PY                     | N                      | N                   |
| 8. Is the influence of the researcher on the research, and vice-versa, addressed?                                           | PN                       | N       | PN                     | N                   | N                      | N                      | N                   |
| 9. Are participants, and their voices, adequately represented?                                                              | Y                        | PY      | Y                      | NI                  | PY                     | PN                     | PY                  |
| 10. Is the research ethical according to current criteria and is there evidence of ethical approval by an appropriate body? | Y                        | NI      | Y                      | NI                  | Y                      | PN                     | Y                   |
| 11. Do the conclusions follow from the analysis, or interpretation, of the data?                                            | Y                        | NI      | Y                      | N                   | PY                     | PN                     | Y                   |
| Overall quality appraisal                                                                                                   | High                     | Low     | High                   | Critical            | Low                    | Low                    | Medium              |

Y=Yes; PY=Probably Yes; PY=Probably No, N=No; NI=No information.
